# Supplementary material
Source: publisher figshare collection journal article supplement (https://sage.figshare.com/ndownloader/files/17822948)
Supplement: Supplementary file 1 [file 17822948]

Supplemental Table 3. Differences in measures of depressive symptoms (PHQ-9) by reported importance (Yes vs. No or somewhat important) and experience (N-S: No/not at all or some vs. Yes)

| Item                                                                               | Important: Very |     |                    | Important: Not/Some |     |                    | Interaction |
|------------------------------------------------------------------------------------|-----------------|-----|--------------------|---------------------|-----|--------------------|-------------|
|                                                                                    | N-S             | Yes | Diff. <sup>a</sup> | N-S                 | Yes | Diff. <sup>a</sup> | Sig.        |
| <b>Domain 1: Physical Environment</b>                                              |                 |     |                    |                     |     |                    |             |
| a. Your room is arranged and decorated the way you want it?                        | 1.14            | .76 | -.38*              | .87                 | .59 | -.28**             | -.11        |
| b. You enjoy the view from their window?                                           | .95             | .84 | -.11               | .91                 | .60 | -.31**             | .20         |
| c. You feel welcome in areas outside of your room?                                 | 1.25            | .76 | -.49*              | 1.06                | .78 | -.28               | -.21        |
| d. You easily get around outside of your room?                                     | 1.01            | .79 | -.22               | .81                 | .78 | -.03               | -.19        |
| e. You go outdoors?                                                                | .96             | .78 | -.18               | .80                 | .80 | -.00               | -.18        |
| f. It is peaceful here?                                                            | 1.00            | .78 | -.22               | .86                 | .57 | -.29               | .06         |
| g. It feels like home here?                                                        | 1.03            | .73 | -.30               | .77                 | .67 | -.09               | -.20        |
| <b>Domain 2: Meaningful Activity</b>                                               |                 |     |                    |                     |     |                    |             |
| a. Do the things you care about?                                                   | .96             | .66 | -.30*              | .95                 | .77 | -.18               | -.12        |
| b. Do things with other people who live here?                                      | 1.12            | .72 | -.40*              | .83                 | .76 | -.07               | -.33        |
| c. Do things just for fun?                                                         | .78             | .76 | -.03               | .95                 | .77 | -.18               | .15         |
| d. Do physical activities (e.g., exercise classes, go on walks, work on strength)? | .76             | .76 | .00                | 1.00                | .60 | -.40**             | .40*        |
| e. Take care of plants?                                                            | 1.03            | .90 | -.13               | .75                 | .74 | -.01               | -.12        |
| f. Spend time with animals?                                                        | .94             | .89 | -.05               | .73                 | .84 | .10                | -.16        |
| g. Listen to or make music that you like?                                          | .99             | .71 | -.29               | .79                 | .96 | .17                | -.46*       |
| h. Do things to help others who live or work here?                                 | .80             | .84 | .04                | .81                 | .79 | -.03               | .06         |
| i. Share your wisdom with the people who work here (e.g., advice)?                 | .92             | .83 | -.09               | .79                 | .86 | .08                | -.16        |
| j. Have a purpose in life?                                                         | 1.02            | .75 | -.27*              | 1.00                | .56 | -.44               | .16         |
| <b>Domain 3: Personalized Care</b>                                                 |                 |     |                    |                     |     |                    |             |
| a. Take into account your health needs?                                            | 1.13            | .74 | -.40*              | 1.09                | .96 | -.14               | -.26        |
| b. Respond quickly to your requests (e.g., to ease your pain, to use the toilet?)  | .98             | .69 | -.29**             | .82                 | .78 | -.05               | -.24        |

|                                                                                                                                       | Important: Very |     |                    | Important: Not/Some |     |                    | Interaction |
|---------------------------------------------------------------------------------------------------------------------------------------|-----------------|-----|--------------------|---------------------|-----|--------------------|-------------|
|                                                                                                                                       | N-S             | Yes | Diff. <sup>a</sup> | N-S                 | Yes | Diff. <sup>a</sup> | Sig.        |
| c. Make you feel at ease when they are helping you (e.g., to get dressed, in the bathroom)?                                           | 1.22            | .74 | -.48**             | .76                 | .68 | -.09               | -.39        |
| d. Tell you how long you have to wait if they can't help you right away?                                                              | 1.00            | .66 | -.34**             | .85                 | .82 | -.03               | -.31        |
| e. Take the time with you that you need?                                                                                              | 1.07            | .69 | -.37**             | 1.06                | .76 | -.29               | -.08        |
| f. Make you feel comfortable asking for help?                                                                                         | 1.08            | .74 | -.35*              | 1.06                | .76 | -.30               | -.05        |
| g. Make sure that you can hear what they say?                                                                                         | 1.28            | .72 | -.55***            | 1.09                | .67 | -.43               | -.13        |
| h. Are gentle when they are helping you or doing things for you (e.g., to get dressed, in the bathroom)?                              | 1.05            | .76 | -.28               | .86                 | .72 | -.14               | -.14        |
| <b>Domain 4: Knowing the Person</b>                                                                                                   |                 |     |                    |                     |     |                    |             |
| a. How you like to have things done?                                                                                                  | .99             | .77 | -.22               | .84                 | .71 | -.14               | -.08        |
| b. The kinds of things you are interested in?                                                                                         | 1.06            | .73 | -.33               | .83                 | .74 | -.08               | -.25        |
| c. How you like to spend your time?                                                                                                   | .98             | .72 | -.26               | .92                 | .73 | -.20               | -.06        |
| d. What makes a good day for you?                                                                                                     | 1.06            | .79 | -.27               | .84                 | .60 | -.25*              | -.03        |
| e. Who is important to you (e.g., family, friends)?                                                                                   | .96             | .79 | -.17               | .89                 | .76 | -.13               | -.05        |
| f. What you worry about?                                                                                                              | .93             | .89 | -.04               | .78                 | .82 | .03                | -.07        |
| g. What you like to be called?                                                                                                        | .87             | .77 | -.10               | .94                 | .84 | -.11               | .01         |
| <b>Domain 5: Autonomy/Choice</b>                                                                                                      |                 |     |                    |                     |     |                    |             |
| a. Get up when you want to?                                                                                                           | 1.04            | .76 | -.28*              | .84                 | .62 | -.22               | -.06        |
| b. Eat meals when you want to?                                                                                                        | .90             | .77 | -.13               | .78                 | .86 | .09                | -.21        |
| c. Take a shower or a bath when you want to?                                                                                          | .98             | .70 | -.28*              | .75                 | .84 | .09                | -.36*       |
| d. Make your own decisions even if others don't approve (e.g., eating foods not on your diet, taking or not taking some medications)? | .98             | .76 | -.22               | .94                 | .67 | -.27               | .06         |
| e. Spend your time the way you want to?                                                                                               | .99             | .78 | -.21               | .95                 | .63 | -.32               | .10         |
| f. Have privacy when you want it?                                                                                                     | .94             | .75 | -.19*              | .84                 | .88 | .04                | -.23        |

|                                                                                                                                             | Important: Very |     |                    | Important: Not/Some |     |                    | Interaction |
|---------------------------------------------------------------------------------------------------------------------------------------------|-----------------|-----|--------------------|---------------------|-----|--------------------|-------------|
|                                                                                                                                             | N-S             | Yes | Diff. <sup>a</sup> | N-S                 | Yes | Diff. <sup>a</sup> | Sig.        |
| g. Can do things for yourself?                                                                                                              | 1.05            | .75 | .30**              | 1.03                | .65 | -.39               | .08         |
| h. Have a say in how this place works (e.g., meal schedules, decorating communal areas, planning social events, hiring & evaluating staff)? | .94             | .65 | -.28               | .82                 | .75 | -.06               | -.22        |
| i. Feel free to express your opinions about things you do not like here?                                                                    | 1.10            | .80 | -.30*              | .71                 | .70 | -.01               | -.29        |
| <b>Domain 6: Treated Like a Person</b>                                                                                                      |                 |     |                    |                     |     |                    |             |
| a. Pay attention to your opinions?                                                                                                          | .93             | .75 | -.18               | .92                 | .88 | -.04               | -.14        |
| b. Show that they are interested in you as a person?                                                                                        | 1.10            | .75 | -.34*              | .75                 | .69 | -.07               | -.28        |
| c. Listen to you without interrupting?                                                                                                      | 1.19            | .73 | -.46**             | .95                 | .69 | -.26               | -.20        |
| d. Show that your needs are important to them?                                                                                              | 1.10            | .65 | -.45***            | .96                 | .89 | -.07               | -.38        |
| e. Understand what it is like for you to live here?                                                                                         | .98             | .71 | -.27*              | .90                 | .51 | -.38**             | .12         |
| f. Answer your questions?                                                                                                                   | 1.15            | .72 | -.44***            | .95                 | .69 | -.26               | -.18        |
| g. Treat you with respect?                                                                                                                  | 1.21            | .74 | -.47**             | .94                 | .77 | -.17               | -.30        |
| h. Treat you with kindness?                                                                                                                 | 1.09            | .76 | -.32               | 1.12                | .80 | -.32               | -.00        |
| <b>Domain 7: Relationship with Staff</b>                                                                                                    |                 |     |                    |                     |     |                    |             |
| a. Listen to you share stories about your life?                                                                                             | .88             | .78 | -.10               | .90                 | .73 | -.17               | .07         |
| b. Tell you about their personal lives?                                                                                                     | .66             | .90 | .25                | .84                 | .80 | -.03               | .28         |
| c. Talk to you about things you are interested in?                                                                                          | .88             | .78 | -.10               | .90                 | .66 | -.23               | .13         |
| d. Spend time with you just talking or being with you?                                                                                      | .88             | .80 | -.09               | .82                 | .72 | -.10               | .01         |
| e. Know what you have done in your life?                                                                                                    | .95             | .72 | -.23               | .84                 | .74 | -.11               | -.13        |
| f. Have things in common with you?                                                                                                          | .82             | .90 | .08                | .86                 | .69 | -.17               | .25         |
| g. Laugh with you?                                                                                                                          | 1.18            | .79 | -.39               | .73                 | .72 | -.02               | -.38        |

|                                                                              | Important: Very |     |                    | Important: Not/Some |     |                    | Interaction |
|------------------------------------------------------------------------------|-----------------|-----|--------------------|---------------------|-----|--------------------|-------------|
|                                                                              | N-S             | Yes | Diff. <sup>a</sup> | N-S                 | Yes | Diff. <sup>a</sup> | Sig.        |
| <b>Domain 8: Organizational Environment</b>                                  |                 |     |                    |                     |     |                    |             |
| a. You can talk to the [owner/ manager/administrator] if you have a problem? | 1.03            | .73 | -.30*              | .85                 | .71 | -.15               | -.15        |
| b. You see the [owner/manager/ administrator] around the home?               | 1.05            | .84 | -.20               | .76                 | .67 | -.09               | -.11        |
| c. The same people help you on most days?                                    | .76             | .94 | .18                | .76                 | .78 | .02                | .16         |
| d. You have a say in who works here?                                         | .95             | .66 | -.30               | .81                 | .84 | .03                | -.33        |
| e. The people who work here have time to help you when you need it?          | .96             | .73 | -.24*              | .97                 | .67 | -.30               | .06         |
| f. The people who work here have a good attitude?                            | 1.01            | .77 | -.24*              | 1.28                | .59 | -.69*              | .46         |
| g. This place is run well?                                                   | .97             | .74 | -.22               | 1.23                | .57 | -.66*              | .44         |

*Note.* All means are weighted and all ns in parentheses are unweighted. N-S: no (not at all) or some receipt.

<sup>a</sup>Based on ordinary least squares (OLS) linear regression results incorporating design weights.

\* p<.05, \*\* p<.01, \*\*\* p<.001.
